1 **Title**

2 Nlrc4 inflammasome is critical for host protection against flagellated *Salmonella*

3  
4 Américo H. López-Yglesias<sup>1\*</sup>, Chun-Chi Lu<sup>1</sup>, Marvin A. Lai<sup>1</sup>, Ellen K. Quarles<sup>1</sup>, Xiaodan Zhao<sup>1</sup>,  
5 Adeline M. Hajjar<sup>2</sup>, Kelly D. Smith<sup>1\*</sup>.

6  
7 1 Department of Laboratory Medicine and Pathology, University of Washington. Seattle, WA.  
8 USA. 98195

9 2 Department of Comparative Medicine, University of Washington. Seattle, WA. USA. 98195

10 \* Current Address: Department of Microbiology and Immunology, Indiana University School of  
11 Medicine-Terre Haute

12 \* Correspondence: Kelly D Smith, 1959 NE Pacific St. Department of Laboratory Medicine and  
13 Pathology, Seattle, WA. 98195. Tel. (206)-543-0820. Fax. (206) 598-4928. Email.  
14 kelsmith@uw.edu.

15

16 **Abstract**

17 *Salmonella enterica* serovar Typhimurium is a leading cause of gastroenteritis worldwide and a  
18 deadly pathogen in children, immunocompromised patients, and the elderly. *Salmonella* induces  
19 innate immune responses through the Nlrc4 inflammasome, which has been demonstrated to  
20 have distinct roles during systemic and mucosal detection of flagellin and non-flagellin molecules.  
21 We hypothesized that Nlrc4 recognition of *Salmonella* flagellin is the dominant protective pathway  
22 during infection. To test this hypothesis, we used wild-type, flagellin-deficient, and flagellin-  
23 overproducing *Salmonella* to establish the role of flagellin in mediating Nlrc4-dependent host  
24 resistance during systemic and mucosal infection. We observed that during the systemic phase  
25 of infection, *Salmonella* efficiently evades Nlrc4-mediated innate immunity. However, during  
26 mucosal *Salmonella* infection, flagellin recognition by the Nlrc4 inflammasome pathway is the  
27 dominant mediator of protective innate immunity. These data establish that recognition of  
28 *Salmonella*'s flagellin by the Nlrc4 inflammasome during mucosal infection is the dominant innate  
29 protective pathway for host resistance against the enteric pathogen.

30

31

32

33

34

35

36

37

38

39

40

41

42

43

44

45

46

47

48

49

50

51

## 52 Introduction

53 *Salmonella* is the causative agent in salmonellosis and is one of the main causes of  
54 gastrointestinal bacterial infections worldwide. Consumption of contaminated food is responsible  
55 for the majority of *Salmonella* infections and is the leading cause of foodborne-related deaths in  
56 the USA.<sup>1</sup> During the initial phase of the infection, the bacteria travels to the intestine where it  
57 encounters a protective layer of mucus lining the intestines.<sup>2</sup> After breaking through the mucus  
58 layer, *Salmonella* infects the intestinal epithelium and lamina propria myeloid cells, which are  
59 capable of detecting the bacteria through innate pattern recognition receptors (PRRs).<sup>3-6</sup> PRRs  
60 recognize highly conserved structures of bacteria, such as rod and needle proteins from the  
61 *Salmonella* pathogenicity island 1 (SPI-1) type three secretion system (TTSS) and flagellin  
62 monomers that compose the flagellar filament.<sup>7-14</sup>

63  
64 *Salmonella's* flagellin, encoded by *fliB* and *fliC*, is a potent ligand that elicits a robust innate  
65 immune response by activating the caspase-1 (Casp1)-dependent inflammasome.<sup>14-16</sup>  
66 Inflammasome recognition of flagellin is dependent on the detection of the conserved site, located  
67 on the carboxyl terminus of the protein, by Naip5 and Naip6 (Naip5/6).<sup>7, 8, 12</sup> Flagellin recognition  
68 by Naip5/6 leads to the formation of a multiprotein complex, resulting in the activation of the Nlrc4-  
69 Casp1-dependent inflammasome.<sup>17</sup> It has also been shown that the adaptor molecule ASC  
70 (apoptotic speck protein containing a caspase recruitment domain; encoded by *Pycard*) can  
71 associate with the Nlrc4 inflammasome resulting in efficient production of IL-1 $\beta$ ; however, ASC-  
72 independent Nlrc4-Casp1 inflammasome activation still results in cell death via pyroptosis.<sup>18</sup>  
73 Flagellin-mediated Nlrc4-dependent activation results in biologically active IL-1 $\beta$  and IL-18,  
74 eicosanoids, and Gasdermin-D-mediated pyroptotic cell death.<sup>19, 20</sup>

75  
76 The SPI-1 TTSS is a critical virulence factor that enables *Salmonella* to colonize and successfully  
77 replicate in the host's intestinal epithelial cells (IECs).<sup>21</sup> Described as a needle-like structure, the  
78 TTSS delivers critical effector proteins, which allows *Salmonella* to create a favorable  
79 environment for colonization within IECs.<sup>22, 23</sup> To counteract these virulence factors, the host uses  
80 PRRs, Naip1 and Naip2 (Naip1/2), which recognize the needle and rod proteins, encoded by *prgI*  
81 and *prgJ*, both of which are required for the TTSS needle complex assembly.<sup>8, 9, 12</sup> Similar to  
82 flagellin, needle and rod recognition leads to the formation of the Nlrc4-Casp1 inflammasome,  
83 resulting in Nlrc4-dependent IL-1 $\beta$  production and pyroptotic cell death.<sup>8, 9, 12</sup>

84  
85 Nlrc4 inflammasome recognition of *Salmonella* by IECs and phagocytes has been extensively  
86 studied and shown to be critical for innate host protection. It has been demonstrated that  
87 *Salmonella*-triggered activation of the Nlrc4 inflammasome in IECs not only results in the  
88 production of cytokine, eicosanoids, and pyroptosis, but also leads to IECs rapid expulsion from  
89 the intestinal epithelium.<sup>3, 6</sup> More recently, it has been illustrated that Naip recognition of  
90 *Salmonella's* pathogen associated molecular patterns (PAMPs) is critical for restricting the  
91 dissemination of the enteric pathogen.<sup>24</sup>

92  
93 To evade Nlrc4 recognition, *Salmonella's* expression of flagellin is tightly regulated by PhoPQ and  
94 ClpXP sensors and FlgM, which silences flagellin production *in vivo*.<sup>25-28</sup> Experimental evidence  
95 suggest that SPI-1 TTSS is required for the intracellular translocation of flagellin, similarly  
96 regulated by two-component sensors, and silenced during intracellular and systemic infection.<sup>29</sup>  
97 We hypothesized that flagellin recognition by the Nlrc4 inflammasome is the dominant pathway  
98 for host protection during mucosal *Salmonella* infection, when both flagellin and SPI-1 are

99 upregulated to promote intestinal colonization and infection. To test our hypothesis, we used an  
100 attenuated strain of *Salmonella* that is unable to repress flagellin production ( $\Delta flgM$ ), in  
101 combination with Nlrc4-deficient (*Nlrc4*<sup>-/-</sup>) mice. Our results reveal that during intraperitoneal (i.p.)  
102 infection, *Salmonella* successfully evades recognition by the Nlrc4 inflammasome. In contrast,  
103 during mucosal infection, *Salmonella* production and secretion of flagellin via the flagellar basal  
104 body, but not SPI-1 TTSS, is detected by the Nlrc4 inflammasome and protects the host against  
105 infection. These data establish that flagellin recognition by the Nlrc4 inflammasome is critical for  
106 innate mucosal protection against *Salmonella enterica* serovar Typhimurium (*S. Typhimurium*).

107  
108  
109  
110  
111  
112  
113  
114  
115  
116  
117  
118  
119  
120  
121  
122  
123  
124  
125  
126  
127  
128  
129  
130  
131  
132  
133  
134  
135  
136  
137  
138  
139  
140  
141  
142  
143  
144

## 145 **Methods**

146 *Ethics Statement.* This study was carried out in strict accordance with the recommendations in  
147 the Guide for the Care and Use of Laboratory Animals of the National Institutes of Health. All  
148 protocols were approved by the Institutional Animal Care and Use Committee of the University of  
149 Washington (protocol: 4031-01, Mucosal Immunity)

150  
151 *Bacterial strains.* The experiments were performed using wild-type (WT; from Brad Cookson,  
152 University of Washington), flagellin-deficient ( $\Delta fliC/fljB$ ; from Brad Cookson University of  
153 Washington), flagellin overexpressing ( $\Delta flgM$ ; a gift from Kelly Hughes), SPI-1 deficient ( $\Delta SPI-1$ ;  
154 from Kelly Hughes), flagellin overexpressing and SPI-1 deficient ( $\Delta flgM/SPI-1$ ;  $\Delta SPI-1$  from Kelly  
155 Hughes), flagellin-deficient and lacking control of flagellin repression ( $\Delta flgM/fliC/fljB$ ), flagellin  
156 overexpressing and lacking the flagellar basal body ( $\Delta flgM/flgB$ ;  $\Delta flgB$  from Kelly Hughes), and  
157 SPI-2 deficient ( $\Delta SPI-2$ ; from Kelly Hughes) *S. Typhimurium* strain SL1344.  $\Delta flgM$  mutant from  
158 Kelly Hughes was then transferred into  $\Delta fliC/fljB$ ,  $\Delta SPI-1$ ,  $\Delta SPI-2$ ,  $\Delta flgB$  SL1344 strains using P22  
159 phage.<sup>30</sup> The deletion of *flgM* was confirmed by PCR. Bacteria were grown in Luria broth (LB) at  
160 37°C with aeration.

161  
162 *Mouse infection.* C57BL/6 mice were purchased from Jackson Labs and housed in our facilities  
163 at the University of Washington. *Caspase-1<sup>-/-</sup> x caspase-11<sup>-/-</sup>* (*Casp1/11<sup>-/-</sup>*), *Nlrc4<sup>-/-</sup>*, and *Nlrp3<sup>-/-</sup>*  
164 (generated by Genetech) were bred in our specific pathogen free (SPF) animal facilities.<sup>31</sup>  
165 Animals were housed under standard barrier conditions in individually ventilated cages. 8-14  
166 week old mice were used for infections throughout this study. All oral infections were performed  
167 as previously described.<sup>15</sup> In brief, one day before infection, food was withdrawn 4 h prior to oral  
168 administration of 20 mg of streptomycin.<sup>32</sup> Food was replaced and 20 h after streptomycin  
169 treatment, food was withdrawn again for 4 h prior to orally infecting mice with 1000 colony forming  
170 units (CFUs) of *S. Typhimurium*. Food was replaced immediately after infection. The *Salmonella*  
171 inoculum was prepared by back-diluting an overnight culture 1:50 in LB + 50 µg/ml of  
172 streptomycin. After 4 h, the concentration of bacteria was measured and diluted in cold PBS to a  
173 concentration of  $1 \times 10^4$  CFU/ml, and CFU of the inoculum was verified by plating on LB agar plates  
174 with 50 µg/ml streptomycin. Five days post-infection, mice were sacrificed by CO<sub>2</sub> asphyxiation,  
175 tissues (intestine, mesenteric lymph node (mLN), spleen, and liver) were promptly removed.  
176 Bacterial burden was assessed by weighing and homogenizing the tissues in PBS with 0.025%  
177 Triton X-100, and plating dilutions of the samples on MacConkey agar plates with streptomycin  
178 (50 µg/ml). Prior to homogenization, the ceca were scraped and blotted to remove fecal content.  
179 *Salmonella* inoculum for systemic infections were prepared as previously described and 1000  
180 CFUs of *S. Typhimurium* were administered intraperitoneally. Five days post-infection, mice were  
181 sacrificed by CO<sub>2</sub> asphyxiation, tissues (spleen and liver) were promptly removed and bacterial  
182 burden was assessed as previously described.

183  
184 *Quantitative histologic assessment.* Formalin-fixed tissue was embedded in paraffin using  
185 standard protocols. 4 µm thick sections were stained with hematoxylin and eosin using standard  
186 procedures. A blinded pathologist examined the slides and scored them according to the following  
187 criteria. Scores were assigned for changes to the cecum as follows: submucosal expansion - 0 =  
188 no significant change, 1 = <25% of the wall, 2 = 25-50% of the wall, 3 =>50% of the wall; mucosal  
189 neutrophilic infiltrate - 0 = no significant infiltrate, 1 = mild neutrophilic inflammation, 2 = moderate  
190 neutrophilic inflammation, 3 = severe neutrophilic inflammation; lymphoplasmacytosis - 0 = no  
191 significant infiltrate, 1= focal infiltrates (mild), 2= multifocal infiltrates (moderate), 3 = extensive

192 infiltrates involving mucosa and submucosa (severe); goblet cells - 0 = >28/HPF, 1 = 11-28/HPF,  
193 2 = 1-10/HPF, 3 = <1/HPF; epithelial integrity - 0 = no significant change, 1 = desquamation  
194 (notable shedding of epithelial cells into the lumen), 2 = erosion (loss of epithelium with retention  
195 of architecture), 3 = ulceration (destruction of lamina propria). Crypt loss was estimated by blinded  
196 pathologist as fraction of cecal epithelium devoid of crypts.

197  
198 *Macrophage cytotoxicity assay.* Thioglycollate-elicited peritoneal macrophages were plated in a  
199 96-well plate at a concentration of  $5 \times 10^5$  macrophages/well in RPMI 1640 medium with L-  
200 glutamine, 10% fetal bovine serum. *S. Typhimurium* was grown overnight in LB medium and back-  
201 diluted the next day 1:50 in LB medium and grown for 3-4 h. The bacteria were centrifuged and  
202 the pellet resuspended to the final desired concentration. Macrophages were infected with the  
203 desired multiplicity of infection (MOI), centrifuged at  $250 \times g$  for 5 min, and the infection was  
204 allowed to progress for an hour. Gentamicin (50  $\mu\text{g/ml}$ ) was added after an hour to kill extracellular  
205 bacteria. After an additional hour, the supernatants were removed and cytotoxicity was measured  
206 using Cytotox 96 kit (Promega).

207  
208 *Statistics.* Significance was obtained by using the software GraphPad Prism (San Diego, CA).  
209 One-way ANOVA was used when comparing three groups or more, using the Dunn's multiple  
210 comparisons test. Two-way ANOVA was used when comparing three groups or more at multiple  
211 time points, using the Tukey's multiple comparisons test. Statistical analyses of survival curve  
212 was done using Log-Rank (Mantel Cox) test. In all graphs, significance was established and  
213 represented using the following system: \* =  $p < 0.05$ , \*\* =  $p < 0.01$ , \*\*\* =  $p < 0.001$ , \*\*\*\* =  $p < 0.0001$ .

214  
215  
216  
217  
218  
219  
220  
221  
222  
223  
224  
225  
226  
227  
228  
229  
230  
231  
232  
233  
234  
235  
236  
237  
238  
239  
240  
241

## 242 Results

243 **S. Typhimurium requires flgM to evade inflammasome detection during i.p. infection.** The  
244 bacterial protein flagellin can be detected by Naip5/6, which activates the Nlrc4-dependent  
245 inflammasome. To evade recognition, *Salmonella* downregulates flagellin expression during host  
246 invasion. We tested whether the Nlrc4 inflammasome contributes to the control of systemic i.p.  
247 infection. To identify the role of Nlrc4 in host resistance against *S. Typhimurium in vivo*, we used  
248 mice lacking Casp1/11 (*Casp1/11*<sup>-/-</sup>), Nlrc4 (*Nlrc4*<sup>-/-</sup>), and Nlrp3 (*Nlrp3*<sup>-/-</sup>). We observed that upon  
249 i.p. infection with *S. Typhimurium* SL1344 (WT), there was no difference in the bacterial burden  
250 in the spleens or livers of mice deficient in the examined inflammasome components compared  
251 to C57BL/6 (B6) controls (Fig. 1A). Similarly, there was no difference in bacterial burden in the  
252 spleens and livers of mice between B6 and the inflammasome-deficient strains of mice infected with  
253 flagellin-deficient ( $\Delta$ *fljB/fliC*) *S. Typhimurium* (Fig. 1B). These data establish that inflammasome  
254 recognition is not the primary mediator of innate immunity during i.p. *S. Typhimurium* infection,  
255 suggesting that *Salmonella* efficiently evades inflammasome detection of flagellin and other  
256 potential ligands during i.p. infection.

257  
258 *Salmonella* FlgM is an anti-sigma factor that binds FliA and prevents the expression of class III  
259 flagellar genes.<sup>28, 33</sup> Upon completion of the flagellar basal body, FlgM is secreted and FliA is  
260 released to activate class III promoters, resulting in completion of the flagellar assembly.<sup>28, 33</sup>  
261 Deletion of *flgM* results in constitutive expression of flagellar class III genes and disruption of  
262 autogenous regulation of flagellar assembly.<sup>28</sup> *flgM*-deficient ( $\Delta$ *flgM*) *S. Typhimurium* expresses  
263 more flagellin protein, has more flagella than WT *Salmonella*, and is attenuated in mice.<sup>15, 28</sup> We  
264 predicted that the attenuated phenotype observed in mice infected with  $\Delta$ *flgM* *S. Typhimurium* is  
265 dependent on the response to flagellin by the Nlrc4 inflammasome. In striking contrast to both  
266 WT and  $\Delta$ *fljB/fliC* *Salmonella* infections,  $\Delta$ *flgM* i.p. infected *Nlrc4*<sup>-/-</sup> and *Casp1/11*<sup>-/-</sup> mice had  
267 dramatically elevated bacterial burden in both the spleen and liver compared to B6 and *Nlrp3*<sup>-/-</sup>  
268 animals (Fig. 1C). Although Nlrp3 has been implicated in *Salmonella* detection during mucosal  
269 infection, we observed no phenotype for Nlrp3 in host protection against i.p. infection by WT,  
270  $\Delta$ *fljB/fliC*, or  $\Delta$ *flgM* *Salmonella*.<sup>34, 35</sup> Overall, these data indicate that the Nlrc4-Casp1/11  
271 inflammasome is a critical mediator of flagellin detection; however, Nlrc4-Casp1/11-mediated  
272 immunity does not provide notable innate defense mechanism during i.p. infection of WT  
273 *Salmonella*.

274  
275 **The Nlrc4-Casp1/11 inflammasome is critical for limiting mucosal inflammation and**  
276 **systemic *Salmonella* infection.** Flagellin is a key protein for bacterial motility; yet, *Salmonella*  
277 is capable of restricting flagellin expression based on its anatomical location in the host.<sup>26</sup>  
278 Therefore, we investigated the role of the Nlrc4 inflammasome during oral infection in  
279 streptomycin pretreated mice. We observed rapid mortality in *Casp1/11*<sup>-/-</sup> and *Nlrc4*<sup>-/-</sup> mice  
280 compared to B6 controls orally infected with WT *S. Typhimurium* (Fig. 2A). Next, we measured  
281 the bacterial burden of *Casp1/11*<sup>-/-</sup>, *Nlrc4*<sup>-/-</sup>, and *Nlrp3*<sup>-/-</sup> mice orally infected with WT *S.*  
282 *Typhimurium*. Our results showed no difference in the cecal bacterial burden between B6,  
283 *Casp1/11*<sup>-/-</sup>, or *Nlrc4*<sup>-/-</sup> mice (Fig. 2B). We also observed that B6, *Casp1/11*<sup>-/-</sup>, and *Nlrc4*<sup>-/-</sup> mice  
284 had elevated cecal bacterial burden compared to *Nlrp3*<sup>-/-</sup> animals (Fig. 2B). *Casp1/11*- and *Nlrc4*-  
285 deficient animals had dramatically elevated bacterial burden in the mLN, spleen, and liver  
286 compared to B6 and *Nlrp3*<sup>-/-</sup> mice (Fig. 2B). Infected *Nlrp3*<sup>-/-</sup> mice had similar amounts of CFUs in  
287 the mLN, spleen, and liver compared to B6 animals (Fig. 2B). Histological examination revealed  
288 marked inflammation in all mice (Fig. 2C, D), and augmented tissue injury in mice lacking either  
289 *Casp1/11* or *Nlrc4* (Fig. 2E). These results reveal that the Nlrc4-Casp1/11 inflammasome plays a  
290 critical role in limiting intestinal tissue injury, as well as bacterial spread and growth in systemic  
291 sites during oral infections.

292

293 **The Nlrc4 inflammasome protects against oral infection with *flgM*-deficient *Salmonella*.**

294 We have previously shown that Casp1/11 is critical for limiting the bacterial burden of mice orally  
295 infected with *flgM*-deficient *Salmonella*.<sup>15</sup> Therefore, we hypothesized that the Nlrc4  
296 inflammasome is also required for limiting growth of *Salmonella* lacking FlgM. To test our  
297 hypothesis, we orally infected inflammasome-deficient mice with  $\Delta flgM$  *S. Typhimurium*. Our  
298 results show that in the absence of Casp1/11 or Nlrc4 there is a significant increase of *S.*  
299 *Typhimurium* in the cecum, mLN, spleen, and liver, compared to B6 and *Nlpr3*<sup>-/-</sup> mice (Fig. 3A).  
300 Furthermore,  $\Delta flgM$  orally infected *Casp1/11*<sup>-/-</sup> and *Nlrc4*<sup>-/-</sup> mice displayed extensive tissue  
301 destruction in the cecum (Fig. 3B-D). These data establish the Nlrc4-dependent inflammasome  
302 as essential for controlling bacterial burden and limiting intestinal pathology during infection.

303

304 **The flagellar basal body is required for Nlrc4 inflammasome detection of flagellin during**

305 **mucosal infection.** We next defined the requirement for *flgM*-deficient *Salmonella*-mediated  
306 inflammasome activation. To generate functional flagella, flagellin proteins are secreted through  
307 the flagellar basal body and polymerize into filaments.<sup>33</sup> It has also been shown that flagellin  
308 activation of the inflammasome requires the SPI-1 TTSS, suggesting that flagellin is also secreted  
309 through SPI-1.<sup>29</sup> To characterize both the flagellar basal body's and SPI-1's role in mediating  
310 flagellin-dependent *Salmonella* pathogenesis, we deleted the *flgB* gene or SPI-1. B6 mice were  
311 orally infected with WT,  $\Delta flgM$ ,  $\Delta flgM$ /SPI-1,  $\Delta flgM$ /*flgB*, or  $\Delta flgM$ /*fljB*/*fliC* *Salmonella* and their  
312 bacterial burdens were assessed. We observed that the absence of both FlgM and SPI-1 had no  
313 effect on the pathogen burden compared to  $\Delta flgM$  infected B6 mice (Fig. 3E). Conversely, in the  
314 absence of FlgM and the flagellar basal body, our results showed a significant increase of the  
315 bacterial burden in the mLN, spleen, and liver compared to  $\Delta flgM$  and  $\Delta flgM$ /SPI-1 infected mice  
316 (Fig. 3E). We also observed the attenuated phenotype of  $\Delta flgM$  *Salmonella* was eliminated in the  
317 absence of flagellin expression (Fig. 3E). These results demonstrate that host recognition of  
318 *Salmonella* flagellin is primarily mediated by the protein secretion through the flagellar basal body  
319 and not SPI-1.

320

321 **Nlrc4 provides modest protection against aflagellate *Salmonella*.** To determine the role of

322 Nlrc4-inflammasome mediated detection of non-flagellin molecules in host resistance, we orally  
323 infected *Casp1/11*<sup>-/-</sup> and *Nlrc4*<sup>-/-</sup> mice with flagellin-deficient *Salmonella*. Compared to B6 mice,  
324 *Nlrc4*<sup>-/-</sup> animals had significantly greater bacterial burden in the mLN, spleen, and liver (Fig. 4A).  
325 Although *Casp1/11*<sup>-/-</sup> mice also displayed elevated bacterial burdens compared to B6 animals, this  
326 did not reach statistical significance (Fig. 4A). Histological analysis revealed no significant  
327 difference in inflammation between any strain of mice (Fig. 4B, C); however, *Nlrc4*<sup>-/-</sup> and B6 mice  
328 did have slightly reduced tissue injury compared to *Casp1/11*-deficient animals (Fig. 4D). Overall,  
329 these data suggest that non-flagellin molecules are recognized by the Nlrc4 inflammasome  
330 pathway, but have only a limited role in restricting bacterial dissemination.

331

332 To assess the overall changes in bacterial burden across all performed experiments, we compiled

333 and compared CFU from B6, *Casp1/11*<sup>-/-</sup>, and *Nlrc4*<sup>-/-</sup> mice orally infected with either WT,  $\Delta flgM$ ,  
334 or  $\Delta fljB$ /*fliC* *Salmonella*. Our analyses demonstrate that the Nlrc4-Casp1/11 inflammasome is  
335 critical for the recognition of flagellin and significantly limits the bacterial burden in peripheral  
336 tissues such as the mLN, spleen, and liver (Fig. 4E). To a lesser extent, non-flagellin molecules  
337 recognized by the Nlrc4 inflammasome pathway also restrict bacterial growth in peripheral  
338 tissues. In addition, flagellin-dependent motility enhances the virulence of *S. Typhimurium*, which  
339 is also seen when comparing infection of *motA*-deficient *Salmonella* to WT and aflagellate  
340 *Salmonella* (Supplemental Fig. 1A). Our results suggest that during *Salmonella* infection, flagellin  
341 is the dominant ligand that is recognized by the Nlrc4 inflammasome pathway and required for  
342 efficient infection.

343

344 **Nlrc4-Casp1/11-mediated intestinal inflammation requires flagellin and SPI-1.** To define the  
345 requirements for *Salmonella* efficiently activating the inflammasome, we tested *Salmonella* genes  
346 that are critical for oral infection in streptomycin pre-treated mice. *In vitro* Casp1/11-dependent  
347 killing of macrophages requires both flagellin and SPI-1 expression (Fig. 5A). Similarly, during  
348 oral infection in streptomycin treated mice, enhanced virulence of *Salmonella* in *Casp1/11*<sup>-/-</sup> mice  
349 is dependent on flagellin and SPI-1 (Supplemental Fig. 2A). Augmented tissue inflammation of  
350 injury in *Casp1/11*<sup>-/-</sup> mice relative to B6 mice was also dependent on SPI-1 and flagellin  
351 (Supplemental Fig. 1B), suggesting flagellin and SPI-1-dependent non-flagellin molecules are  
352 both required for enhanced virulence and to trigger intestinal pathology.

353  
354 To assess the role of flagellin and SPI-1-dependent non-flagellin molecules in activating the Nlrc4  
355 inflammasome, we infected mice with *Salmonella* lacking both flagellin and the entire SPI-1  
356 needle complex ( $\Delta$ SPI-1/*fliJ*/*fliC*). We observed no differences between the bacterial burden of  
357 either i.p. or orally infected B6 and *Nlrc4*<sup>-/-</sup> mice in all examined tissues (Fig. 5B, C). Yet, these  
358 results showed a subtle increase of CFUs in orally-infected *Casp1/11*<sup>-/-</sup> compared to both B6 and  
359 *Nlrc4*<sup>-/-</sup> animals in all tissues (Fig. 5C). Notably, examination of intestinal histology revealed that  
360 the absence of both flagellin and SPI-1 alleviated intestinal inflammation and tissue injury in all  
361 strains of mice (Fig. 5D-F). These data illustrate that flagellin and SPI-1 are required for efficient  
362 cecal colonization and *Salmonella*-induced intestinal inflammation and tissue injury. Overall,  
363 these results demonstrate that Nlrc4-mediated protection against *Salmonella* is dependent  
364 primarily on the expression of flagellin, and to a lesser extent SPI-1.

365  
366  
367  
368  
369  
370  
371



## 372 Discussion

373 Previously, we demonstrated that flagellin recognition by Casp1/11 controls infection of *flgM*-  
374 deficient *S. Typhimurium* and limits intestinal inflammation and injury.<sup>15</sup> It has been shown that  
375 *Salmonella*-mediated activation of the Nlr4 inflammasome has distinct roles during systemic and  
376 mucosal infection through the detection of flagellin and non-flagellin molecules.<sup>7-10, 12, 14</sup> In this  
377 article, we provide a more comprehensive understanding of how innate recognition of *S.*  
378 *Typhimurium* flagellin by the Nlr4 inflammasome is essential for mucosal protection against the  
379 enteric pathogen. Notably, the inflammasome was not required for host defense against  
380 *Salmonella* infection when mice were infected via the i.p. route (Fig. 1A). This is likely due to the  
381 efficient downregulation of inflammasome ligands during the systemic phase of infection. In  
382 contrast, the Nlr4 inflammasome is critical for prevention of *Salmonella*-induced intestinal tissue  
383 injury and systemic dissemination during mucosal infection (Fig. 2B). These data confirm that  
384 innate recognition of flagellin and SPI-1 TTSS structural proteins by the Nlr4-Casp1/11  
385 inflammasome is critical to limit bacterial burden and intestinal pathology during mucosal  
386 infections.

387  
388 Previous studies have shown contradicting results as to the role of the Nlrp3 inflammasome in  
389 innate immunity against *S. Typhimurium*. The data reported by De Jong et al., and Hausmann et  
390 al., are consistent with our own, indicating a limited role for Nlrp3 in *Salmonella* resistance.<sup>24, 36</sup>  
391 However, Broz and colleagues' data indicate that innate recognition of *Salmonella* by the Nlrp3  
392 inflammasome plays a significant albeit redundant role with Nlr4 to limit *Salmonella* infection.<sup>34</sup>  
393 Discrepancies between studies may be due to the limited number of mice tested and potential  
394 differences in gut microbiota that can influence oral infections. The preponderance of the data  
395 supports that for oral *Salmonella* infection in mice, the Nlrp3 inflammasome provides limited  
396 protection.

397  
398 Using  $\Delta flgM$  *S. Typhimurium* our data demonstrates that potent activation of the Nlr4-Casp1/11  
399 inflammasome pathway substantially limits bacterial burden and intestinal tissue damage (Fig.  
400 3A-D). Because it has been shown *in vitro* that secretion of flagellin through the SPI-1 TTSS  
401 activates the inflammasome, we tested if the SPI-1 secretion pathway is required to activate the  
402 inflammasome *in vivo*. Our results establish that during oral infection with *flgM*-deficient  
403 *Salmonella*, FlgB-dependent secretion and assembly of flagella are required for flagellin-  
404 dependent activation of the inflammasome and that SPI-1 is not (Fig. 3E). Leakage of flagellin out  
405 of damaged *Salmonella*-containing vacuoles or escape of *Salmonella* into the cytosol are possible  
406 mechanisms for cytosolic delivery of flagellin that may be more relevant *in vivo*.

407  
408 The critical role for Nlr4 during mucosal *Salmonella* infection most likely reflects the need for  
409 flagella and the SPI-1 TTSS to efficiently invade host IECs. During oral WT *Salmonella* infection,  
410 SPI-1 and flagellin are both targeted by the Nlr4 inflammasome. Using  $\Delta flgM$  *S. Typhimurium*,  
411 our data indicates that recognition of flagellin by the Nlr4-Casp1/11 inflammasome significantly  
412 reduces intestinal pathology and tissue injury (Fig. 3); likewise, intestinal tissue damage is  
413 augmented by deleting flagellin in *Salmonella* to levels seen in *Nlr4*<sup>-/-</sup> or *Casp1/11*<sup>-/-</sup> mice (Fig.  
414 4). SPI-1 is required to induce maximal intestinal inflammation and injury, and this is independent  
415 of the Casp1/11-inflammasome (Supplemental Fig. 2B). These results indicate that flagellin and  
416 SPI-1 are critical triggers of intestinal inflammation and injury through inflammasome-dependent  
417 and -independent pathways. Deleting both flagellin and SPI-1 alleviated *Salmonella*-mediated  
418 intestinal pathology and tissue damage, but did not prevent systemic dissemination of the bacteria  
419 (Fig. 5).

420  
421 The limited phenotype for *S. Typhimurium* mutants lacking flagellin expression in B6 mice can be  
422 attributed to a concomitant loss of motility. This is most readily observed when looking at infection

423 of B6 mice by  $\Delta motA$  *S. Typhimurium* (Sup. Fig. 1A). When amotile flagellin-sufficient bacteria  
424 are compared to amotile flagellin-deficient bacteria, loss of flagellin expression results in  
425 enhanced virulence. Thus, motility enhances *Salmonella*'s virulence, which is offset by increased  
426 host resistance through the detection of flagellin by the Nlrc4-inflammasome. Nlrc4-  
427 inflammasome induced inflammation also benefits *Salmonella* colonization of the gut and  
428 increases transmissibility, providing additional benefits for maintenance of flagellin-dependent  
429 motility in the face of host innate immune surveillance.

430  
431 Since *Casp1/11*<sup>-/-</sup> mice lack both canonical and non-canonical inflammasome pathways, the  
432 mucosal injury observed in these mice is independent of both the caspase-1 and caspase-11  
433 inflammasomes. Epithelial cell intrinsic Naip-Nlrc4-Casp1 activation has been shown to induce  
434 cellular expulsion of infected enterocytes into the intestinal lumen, preventing *S. Typhimurium*  
435 infection of lamina propria mononuclear phagocytes, thereby restricting *Salmonella* dissemination  
436 to systemic tissues.<sup>3</sup> We have previously shown that enhanced IL-12 and IFN- $\gamma$  production by  
437 lamina propria leukocytes correlates with tissue injury.<sup>15</sup> In addition, *Salmonella* accumulates  
438 more readily in lamina propria macrophages in the absence of *Casp1/11*.<sup>15</sup> Thus, deficiency in  
439 the Nlrc4-Casp1 inflammasome may promote the accumulation of *Salmonella* within lamina  
440 propria macrophages and IFN- $\gamma$ -dependent immunopathology.

441  
442 Our study demonstrates that SPI-1 and flagellin are critical for efficient mucosal infection and the  
443 Nlrc4-inflammasome targets these virulence pathways to limit mucosal infection, inflammation,  
444 and tissue injury. Overproduction of flagellin in  $\Delta flgM$  *S. Typhimurium* prevents excessive tissue  
445 injury, inflammation, and systemic spread in a Nlrc4-Casp1/11-dependent manner. Constitutive  
446 production of flagellin is a strategy to attenuate *Salmonella* while preserving the expression of this  
447 important virulence factor and target of innate and adaptive immunity. This may be useful for the  
448 development of live attenuated vaccines. Similar strategies to create *Salmonella* with constitutive  
449 SPI-1 expression may behave similarly and provoke protective innate immunity while maintaining  
450 the expression of important targets for adaptive immune responses.

451  
452  
453  
454  
455  
456  
457  
458  
459  
460  
461  
462  
463  
464

465 **Figure Legends**

466  
467 **Figure 1 *S. Typhimurium* requires flgM to evade inflammasome detection during**  
468 **intraperitoneal infection.** Bacterial burden of B6 (n=10-20), *Casp1/11*<sup>-/-</sup> (n=9-15), *Nlr4*<sup>-/-</sup> (n=8-  
469 11), and *Nlrp3*<sup>-/-</sup> (n=11-12) mice i.p. infected with 1000 CFUs WT SL1344 (A),  $\Delta$ *fljB/fliC* (B), or  
470  $\Delta$ *flgM* *S. Typhimurium* (C) in the spleen and liver. Statistical analyses were done on using one-  
471 way ANOVA with Dunn's multiple comparison test, \*p<0.05, \*\*p<0.01, \*\*\*p<0.001. Error bars,  
472 standard error mean.

473  
474 **Figure 2 The Nlr4-Casp1/11 inflammasome is critical for limiting systemic *Salmonella***  
475 **infection.** Survival of B6 (n=7), *Casp1/11*<sup>-/-</sup> (n=9), and *Nlr4*<sup>-/-</sup> (n=7) mice that were orally infected  
476 with 1000 CFUs of WT SL1344 *S. Typhimurium* (A). Bacterial burden of B6 (n=15), *Casp1/11*<sup>-/-</sup>  
477 (n=9), *Nlr4*<sup>-/-</sup> (n=4), and *Nlrp3*<sup>-/-</sup> (n=10) mice orally infected with 1000 CFUs WT SL1344 *S.*  
478 *Typhimurium* in the cecum, mLN, spleen, and liver (B). Representative histology of the cecum  
479 infected with WT SL1344 *S. Typhimurium* (C). Histological scores for changes in the cecum (D).  
480 Frequency of crypt loss in the cecum (E). Survival curve is a combination of two-independent  
481 experiments involving at least 3 mice per group. Statistical analyses of survival curve was done  
482 using Log-Rank (Mantel Cox) Test. Statistical analyses were done on using one-way ANOVA with  
483 Dunn's multiple comparison test, \*p<0.05, \*\*p<0.01, \*\*\*p<0.001, \*\*\*\*p<0.0001. Error bars,  
484 standard error mean.

485  
486 **Figure 3 The Nlr4-Casp1/11 inflammasome is required to mediate the attenuation of flgM-**  
487 **deficient *S. Typhimurium*.** Bacterial burden of B6 (n=24), *Casp1/11*<sup>-/-</sup> (n=14), *Nlr4*<sup>-/-</sup> (n=6), and  
488 *Nlrp3*<sup>-/-</sup> (n=14) mice orally infected with 1000 CFUs  $\Delta$ *flgM* *S. Typhimurium* in the cecum, mLN,  
489 spleen, and liver (A). Representative histology (20x) of the cecum infected with  $\Delta$ *flgM* *S.*  
490 *Typhimurium* (B). Histological scores for changes in the cecum (C). Frequency of crypt loss in the  
491 cecum (D). Bacterial burden of B6 mice orally infected with 1000 CFUs of  $\Delta$ *flgM* (n=24),  
492  $\Delta$ *flgM*/SPI-1 (n=10),  $\Delta$ *flgM*/*flgB* (n=10), or  $\Delta$ *flgM*/*fljB/fliC* (n=15) *S. Typhimurium* in the cecum,  
493 mLN, spleen, and liver (E). Statistical analyses were done on using one-way ANOVA with Dunn's  
494 multiple comparison test, \*p<0.05, \*\*p<0.01, \*\*\*p<0.001, \*\*\*\*p<0.0001. Error bars, standard error  
495 mean.

496  
497 **Figure 4 Nlr4-Casp1/11-mediated host protection is dependent on flagellin expression.**  
498 Bacterial burden of B6 (n=13), *Casp1/11*<sup>-/-</sup> (n=15), and *Nlr4*<sup>-/-</sup> (n=16) mice orally infected with  
499 1000 CFUs  $\Delta$ *fljB/fliC* *S. Typhimurium* in the cecum, mLN, spleen, and liver (A). Representative  
500 histology (20x) of the cecum infected with  $\Delta$ *fljB/fliC* *S. Typhimurium* (B). Histological scores for  
501 changes in the cecum (C). Frequency of crypt loss in the cecum (D). Composite analysis of WT  
502 SL1344,  $\Delta$ *flgM*, and  $\Delta$ *fljB/fliC* *S. Typhimurium* infections in B6, *Casp1/11*<sup>-/-</sup>, and *Nlr4*<sup>-/-</sup> mice (E).  
503 Statistical analyses were done on using one-way ANOVA with Dunn's multiple comparison test,  
504 \*p<0.05, \*\*p<0.01, \*\*\*p<0.001, \*\*\*\*p<0.0001. Error bars, standard error mean.

505  
506 **Figure 5 Flagellin-independent Nlr4-Casp1/11-mediated intestinal inflammation is SPI-1-**  
507 **dependent.** *Salmonella* induced cell death in thioglycollate elicited peritoneal macrophages  
508 measured by LDH release assay (A). Bacterial burden of B6 (n=18), *Casp1/11*<sup>-/-</sup> (n=13), and *Nlr4*  
509 <sup>-/-</sup> (n=18) mice i.p. infected with 1000 CFUs  $\Delta$ *flgM*/SPI-1 *S. Typhimurium* in the spleen and liver  
510 (B). Bacterial burden of B6 (n=14), *Casp1/11*<sup>-/-</sup> (n=11), and *Nlr4*<sup>-/-</sup> (n=8) mice orally infected with  
511 1000 CFUs  $\Delta$ *flgM*/SPI-1 *S. Typhimurium* in the cecum, mLN, spleen, and liver (C). Representative  
512 histology (20x) of the cecum infected with  $\Delta$ *flgM*/SPI-1 *S. Typhimurium* (D). Histological scores  
513 for changes in the cecum (E). Frequency of crypt loss in the cecum (F). Statistical analyses were  
514 done using two-way ANOVA with Tukey's multiple comparison test (A) or one-way ANOVA with

515 Dunn's multiple comparison test, \* $p < 0.05$ , \*\* $p < 0.01$ , \*\*\* $p < 0.001$ , \*\*\*\* $p < 0.0001$  (B, C, E, F). Error  
516 bars, standard error mean; ND=not detected.

517

518 **Supplemental Fig. 1**

519 Bacterial burden of B6 mice orally infected with 1000 CFUs of WT SL1344,  $\Delta fliB/fliC$ , or  $\Delta motA$  *S.*  
520 Typhimurium in the mLN and liver (**A**). Statistical analyses were done one-way ANOVA with  
521 Dunn's multiple comparison test, \* $p < 0.05$ . Error bars, standard error mean.

522

523 **Supplemental Fig. 2**

524 Bacterial burden of B6 and *Casp1/11<sup>-/-</sup>* mice orally infected with 1000 CFUs of  $\Delta$ SPI-1 *S.*  
525 Typhimurium in the cecum, mLN, spleen, and liver (**A**). Histological scores for changes in the  
526 cecum of B6 and *Casp1/11<sup>-/-</sup>* mice orally infected with WT SL1344,  $\Delta fliB/fliC$ ,  $\Delta$ SPI-1,  $\Delta$ SPI-  
527 1/ $\Delta fliB/fliC$ ,  $\Delta$ SPI-2 *S.* Typhimurium (**B**). Statistical analyses were done with Mann-Whitney test,  
528 \*\* $p < 0.01$ , \*\*\*\* $p < 0.0001$ . Error bars, standard error mean.

529

530

531

532

533

534

535

536

537

538

539

540

541

542

543

544

545

546

547

548

549

550

551

552

553

554

555

556

557

558

559

560

561

562

563

564

## 565 **References**

- 566 1. Scallan E, Hoekstra RM, Angulo FJ, Tauxe RV, Widdowson MA, Roy SL, Jones JL, Griffin PM.  
567 Foodborne illness acquired in the United States--major pathogens. *Emerging infectious diseases*.  
568 2011;17(1):7-15. Epub 2011/01/05. doi: 10.3201/eid1701.p11101. PubMed PMID: 21192848; PMCID:  
569 PMC3375761.
- 570 2. Furter M, Sellin ME, Hansson GC, Hardt WD. Mucus Architecture and Near-Surface Swimming  
571 Affect Distinct Salmonella Typhimurium Infection Patterns along the Murine Intestinal Tract. *Cell reports*.  
572 2019;27(9):2665-78.e3. Epub 2019/05/30. doi: 10.1016/j.celrep.2019.04.106. PubMed PMID: 31141690;  
573 PMCID: PMC6547020.
- 574 3. Sellin ME, Müller AA, Felmy B, Dolowschiak T, Diard M, Tardivel A, Maslowski KM, Hardt WD.  
575 Epithelium-intrinsic NAIP/NLRC4 inflammasome drives infected enterocyte expulsion to restrict  
576 Salmonella replication in the intestinal mucosa. *Cell host & microbe*. 2014;16(2):237-48. Epub  
577 2014/08/15. doi: 10.1016/j.chom.2014.07.001. PubMed PMID: 25121751.
- 578 4. Hapfelmeier S, Müller AJ, Stecher B, Kaiser P, Barthel M, Endt K, Eberhard M, Robbiani R, Jacobi  
579 CA, Heikenwalder M, Kirschning C, Jung S, Stallmach T, Kremer M, Hardt WD. Microbe sampling by  
580 mucosal dendritic cells is a discrete, MyD88-independent step in DeltainvG S. Typhimurium colitis. *The*  
581 *Journal of experimental medicine*. 2008;205(2):437-50. Epub 2008/02/13. doi: 10.1084/jem.20070633.  
582 PubMed PMID: 18268033; PMCID: PMC2271026.
- 583 5. Franchi L, Kamada N, Nakamura Y, Burberry A, Kuffa P, Suzuki S, Shaw MH, Kim YG, Núñez G.  
584 NLRC4-driven production of IL-1 $\beta$  discriminates between pathogenic and commensal bacteria and  
585 promotes host intestinal defense. *Nature immunology*. 2012;13(5):449-56. Epub 2012/04/10. doi:  
586 10.1038/ni.2263. PubMed PMID: 22484733; PMCID: PMC3361590.
- 587 6. Rauch I, Deets KA, Ji DX, von Moltke J, Tenthorey JL, Lee AY, Philip NH, Ayres JS, Brodsky IE, Gronert  
588 K, Vance RE. NAIP-NLRC4 Inflammasomes Coordinate Intestinal Epithelial Cell Expulsion with Eicosanoid  
589 and IL-18 Release via Activation of Caspase-1 and -8. *Immunity*. 2017;46(4):649-59. Epub 2017/04/16. doi:  
590 10.1016/j.immuni.2017.03.016. PubMed PMID: 28410991; PMCID: PMC5476318.
- 591 7. Lightfield KL, Persson J, Brubaker SW, Witte CE, von Moltke J, Dunipace EA, Henry T, Sun YH, Cado  
592 D, Dietrich WF, Monack DM, Tsolis RM, Vance RE. Critical function for Naip5 in inflammasome activation  
593 by a conserved carboxy-terminal domain of flagellin. *Nature immunology*. 2008;9(10):1171-8. Epub  
594 2008/08/30. doi: 10.1038/ni.1646. PubMed PMID: 18724372; PMCID: PMC2614210.
- 595 8. Zhao Y, Yang J, Shi J, Gong YN, Lu Q, Xu H, Liu L, Shao F. The NLRC4 inflammasome receptors for  
596 bacterial flagellin and type III secretion apparatus. *Nature*. 2011;477(7366):596-600. Epub 2011/09/16.  
597 doi: 10.1038/nature10510. PubMed PMID: 21918512.
- 598 9. Yang J, Zhao Y, Shi J, Shao F. Human NAIP and mouse NAIP1 recognize bacterial type III secretion  
599 needle protein for inflammasome activation. *Proceedings of the National Academy of Sciences of the*  
600 *United States of America*. 2013;110(35):14408-13. Epub 2013/08/14. doi: 10.1073/pnas.1306376110.  
601 PubMed PMID: 23940371; PMCID: PMC3761597.
- 602 10. Lopez-Yglesias AH, Lu CC, Zhao X, Chou T, VandenBos T, Strong RK, Smith KD. FliC's Hypervariable  
603 D3 Domain Is Required for Robust Anti-Flagellin Primary Antibody Responses. *Immunohorizons*.  
604 2019;3(9):422-32. Epub 2019/09/07. doi: 10.4049/immunohorizons.1800061. PubMed PMID: 31488506.
- 605 11. Smith KD, Andersen-Nissen E, Hayashi F, Strobe K, Bergman MA, Barrett SL, Cookson BT, Aderem  
606 A. Toll-like receptor 5 recognizes a conserved site on flagellin required for protofilament formation and  
607 bacterial motility. *Nature immunology*. 2003;4(12):1247-53. Epub 2003/11/20. doi: 10.1038/ni1011.  
608 PubMed PMID: 14625549.
- 609 12. Kofoed EM, Vance RE. Innate immune recognition of bacterial ligands by NAIPs determines  
610 inflammasome specificity. *Nature*. 2011;477(7366):592-5. Epub 2011/08/30. doi: 10.1038/nature10394.  
611 PubMed PMID: 21874021; PMCID: PMC3184209.

- 612 13. Hayashi F, Smith KD, Ozinsky A, Hawn TR, Yi EC, Goodlett DR, Eng JK, Akira S, Underhill DM,  
613 Aderem A. The innate immune response to bacterial flagellin is mediated by Toll-like receptor 5. *Nature*.  
614 2001;410(6832):1099-103. Epub 2001/04/27. doi: 10.1038/35074106. PubMed PMID: 11323673.
- 615 14. Lopez-Yglesias AH, Zhao X, Quarles EK, Lai MA, VandenBos T, Strong RK, Smith KD. Flagellin  
616 induces antibody responses through a TLR5- and inflammasome-independent pathway. *Journal of*  
617 *immunology*. 2014;192(4):1587-96. Epub 2014/01/21. doi: 10.4049/jimmunol.1301893. PubMed PMID:  
618 24442437; PMCID: PMC3925749.
- 619 15. Lai MA, Quarles EK, Lopez-Yglesias AH, Zhao X, Hajjar AM, Smith KD. Innate immune detection of  
620 flagellin positively and negatively regulates salmonella infection. *PloS one*. 2013;8(8):e72047. Epub  
621 2013/08/27. doi: 10.1371/journal.pone.0072047. PubMed PMID: 23977202; PMCID: PMC3747147.
- 622 16. Miao EA, Alpuche-Aranda CM, Dors M, Clark AE, Bader MW, Miller SI, Aderem A. Cytoplasmic  
623 flagellin activates caspase-1 and secretion of interleukin 1beta via Ipaf. *Nature immunology*.  
624 2006;7(6):569-75. Epub 2006/05/02. doi: 10.1038/ni1344. PubMed PMID: 16648853.
- 625 17. Ren T, Zamboni DS, Roy CR, Dietrich WF, Vance RE. Flagellin-deficient *Legionella* mutants evade  
626 caspase-1- and Naip5-mediated macrophage immunity. *PLoS pathogens*. 2006;2(3):e18. Epub  
627 2006/03/23. doi: 10.1371/journal.ppat.0020018. PubMed PMID: 16552444; PMCID: PMC1401497.
- 628 18. Mariathasan S, Newton K, Monack DM, Vucic D, French DM, Lee WP, Roose-Girma M, Erickson S,  
629 Dixit VM. Differential activation of the inflammasome by caspase-1 adaptors ASC and Ipaf. *Nature*.  
630 2004;430(6996):213-8. Epub 2004/06/11. doi: 10.1038/nature02664. PubMed PMID: 15190255.
- 631 19. Shi J, Zhao Y, Wang K, Shi X, Wang Y, Huang H, Zhuang Y, Cai T, Wang F, Shao F. Cleavage of GSDMD  
632 by inflammatory caspases determines pyroptotic cell death. *Nature*. 2015;526(7575):660-5. Epub  
633 2015/09/17. doi: 10.1038/nature15514. PubMed PMID: 26375003.
- 634 20. von Moltke J, Trinidad NJ, Moayeri M, Kintzer AF, Wang SB, van Rooijen N, Brown CR, Krantz BA,  
635 Leppla SH, Gronert K, Vance RE. Rapid induction of inflammatory lipid mediators by the inflammasome in  
636 vivo. *Nature*. 2012;490(7418):107-11. Epub 2012/08/21. doi: 10.1038/nature11351. PubMed PMID:  
637 22902502; PMCID: PMC3465483.
- 638 21. Galán JE, Curtiss R, 3rd. Cloning and molecular characterization of genes whose products allow  
639 *Salmonella typhimurium* to penetrate tissue culture cells. *Proceedings of the National Academy of*  
640 *Sciences of the United States of America*. 1989;86(16):6383-7. Epub 1989/08/01. doi:  
641 10.1073/pnas.86.16.6383. PubMed PMID: 2548211; PMCID: PMC297844.
- 642 22. Kubori T, Matsushima Y, Nakamura D, Uralil J, Lara-Tejero M, Sukhan A, Galán JE, Aizawa SI.  
643 Supramolecular structure of the *Salmonella typhimurium* type III protein secretion system. *Science*.  
644 1998;280(5363):602-5. Epub 1998/05/09. doi: 10.1126/science.280.5363.602. PubMed PMID: 9554854.
- 645 23. Raffatellu M, Wilson RP, Chessa D, Andrews-Polymenis H, Tran QT, Lawhon S, Khare S, Adams LG,  
646 Bäumlér AJ. SipA, SopA, SopB, SopD, and SopE2 contribute to *Salmonella enterica* serotype typhimurium  
647 invasion of epithelial cells. *Infection and immunity*. 2005;73(1):146-54. Epub 2004/12/25. doi:  
648 10.1128/iai.73.1.146-154.2005. PubMed PMID: 15618149; PMCID: PMC538951.
- 649 24. Hausmann A, Böck D, Geiser P, Berthold DL, Fattinger SA, Furter M, Bouman JA, Barthel-Scherrer  
650 M, Lang CM, Bakkeren E, Kolinko I, Diard M, Bumann D, Slack E, Regoes RR, Pilhofer M, Sellin ME, Hardt  
651 WD. Intestinal epithelial NAIP/NLRC4 restricts systemic dissemination of the adapted pathogen  
652 *Salmonella Typhimurium* due to site-specific bacterial PAMP expression. *Mucosal immunology*.  
653 2020;13(3):530-44. Epub 2020/01/19. doi: 10.1038/s41385-019-0247-0. PubMed PMID: 31953493;  
654 PMCID: PMC7181392.
- 655 25. Adams P, Fowler R, Kinsella N, Howell G, Farris M, Coote P, O'Connor CD. Proteomic detection of  
656 PhoPQ- and acid-mediated repression of *Salmonella* motility. *Proteomics*. 2001;1(4):597-607. Epub  
657 2001/10/30. doi: 10.1002/1615-9861(200104)1:4<597::Aid-prot597>3.0.Co;2-p. PubMed PMID:  
658 11681212.

- 659 26. Cummings LA, Wilkerson WD, Bergsbaken T, Cookson BT. In vivo, *fliC* expression by *Salmonella*  
660 *enterica* serovar Typhimurium is heterogeneous, regulated by ClpX, and anatomically restricted. *Mol*  
661 *Microbiol.* 2006;61(3):795-809. Epub 2006/06/29. doi: 10.1111/j.1365-2958.2006.05271.x. PubMed  
662 PMID: 16803592.
- 663 27. Tomoyasu T, Takaya A, Isogai E, Yamamoto T. Turnover of FlhD and FlhC, master regulator  
664 proteins for *Salmonella* flagellum biogenesis, by the ATP-dependent ClpXP protease. *Mol Microbiol.*  
665 2003;48(2):443-52. Epub 2003/04/05. doi: 10.1046/j.1365-2958.2003.03437.x. PubMed PMID: 12675803.
- 666 28. Schmitt CK, Darnell SC, O'Brien AD. The *Salmonella typhimurium* *flgM* gene, which encodes a  
667 negative regulator of flagella synthesis and is involved in virulence, is present and functional in other  
668 *Salmonella* species. *FEMS Microbiol Lett.* 1996;135(2-3):281-5. Epub 1996/01/15. doi: 10.1111/j.1574-  
669 6968.1996.tb08002.x. PubMed PMID: 8595870.
- 670 29. Sun YH, Rolán HG, Tsois RM. Injection of flagellin into the host cell cytosol by *Salmonella enterica*  
671 serotype Typhimurium. *The Journal of biological chemistry.* 2007;282(47):33897-901. Epub 2007/10/04.  
672 doi: 10.1074/jbc.C700181200. PubMed PMID: 17911114.
- 673 30. Karlinsey JE.  $\lambda$ -Red genetic engineering in *Salmonella enterica* serovar Typhimurium.  
674 *Methods in enzymology.* 2007;421:199-209. Epub 2007/03/14. doi: 10.1016/s0076-6879(06)21016-4.  
675 PubMed PMID: 17352924.
- 676 31. Kuida K, Lippke JA, Ku G, Harding MW, Livingston DJ, Su MS, Flavell RA. Altered cytokine export  
677 and apoptosis in mice deficient in interleukin-1 beta converting enzyme. *Science.* 1995;267(5206):2000-  
678 3. Epub 1995/03/31. doi: 10.1126/science.7535475. PubMed PMID: 7535475.
- 679 32. Barthel M, Hapfelmeier S, Quintanilla-Martínez L, Kremer M, Rohde M, Hogardt M, Pfeffer K,  
680 Rüssmann H, Hardt W-D. Pretreatment of mice with streptomycin provides a *Salmonella enterica* serovar  
681 Typhimurium colitis model that allows analysis of both pathogen and host. *Infection and immunity.*  
682 2003;71(5):2839-58. doi: 10.1128/iai.71.5.2839-2858.2003. PubMed PMID: 12704158.
- 683 33. Aldridge P, Hughes KT. Regulation of flagellar assembly. *Current opinion in microbiology.*  
684 2002;5(2):160-5. Epub 2002/04/06. doi: 10.1016/s1369-5274(02)00302-8. PubMed PMID: 11934612.
- 685 34. Broz P, Newton K, Lamkanfi M, Mariathasan S, Dixit VM, Monack DM. Redundant roles for  
686 inflammasome receptors NLRP3 and NLRC4 in host defense against *Salmonella*. *The Journal of*  
687 *experimental medicine.* 2010;207(8):1745-55. Epub 2010/07/07. doi: 10.1084/jem.20100257. PubMed  
688 PMID: 20603313; PMCID: PMC2916133.
- 689 35. Man SM, Hopkins LJ, Nugent E, Cox S, Glück IM, Toulomousis P, Wright JA, Cicuta P, Monie TP,  
690 Bryant CE. Inflammasome activation causes dual recruitment of NLRC4 and NLRP3 to the same  
691 macromolecular complex. *Proceedings of the National Academy of Sciences of the United States of*  
692 *America.* 2014;111(20):7403-8. Epub 2014/05/08. doi: 10.1073/pnas.1402911111. PubMed PMID:  
693 24803432; PMCID: PMC4034195.
- 694 36. De Jong HK, Koh GC, van Lieshout MH, Roelofs JJ, van Dissel JT, van der Poll T, Wiersinga WJ.  
695 Limited role for ASC and NLRP3 during in vivo *Salmonella Typhimurium* infection. *BMC Immunol.*  
696 2014;15:30. Epub 2014/08/15. doi: 10.1186/s12865-014-0030-7. PubMed PMID: 25115174; PMCID:  
697 PMC4243774.

698  
699  
700  
701  
702  
703  
704  
705  
706

707 **FIGURE 1**

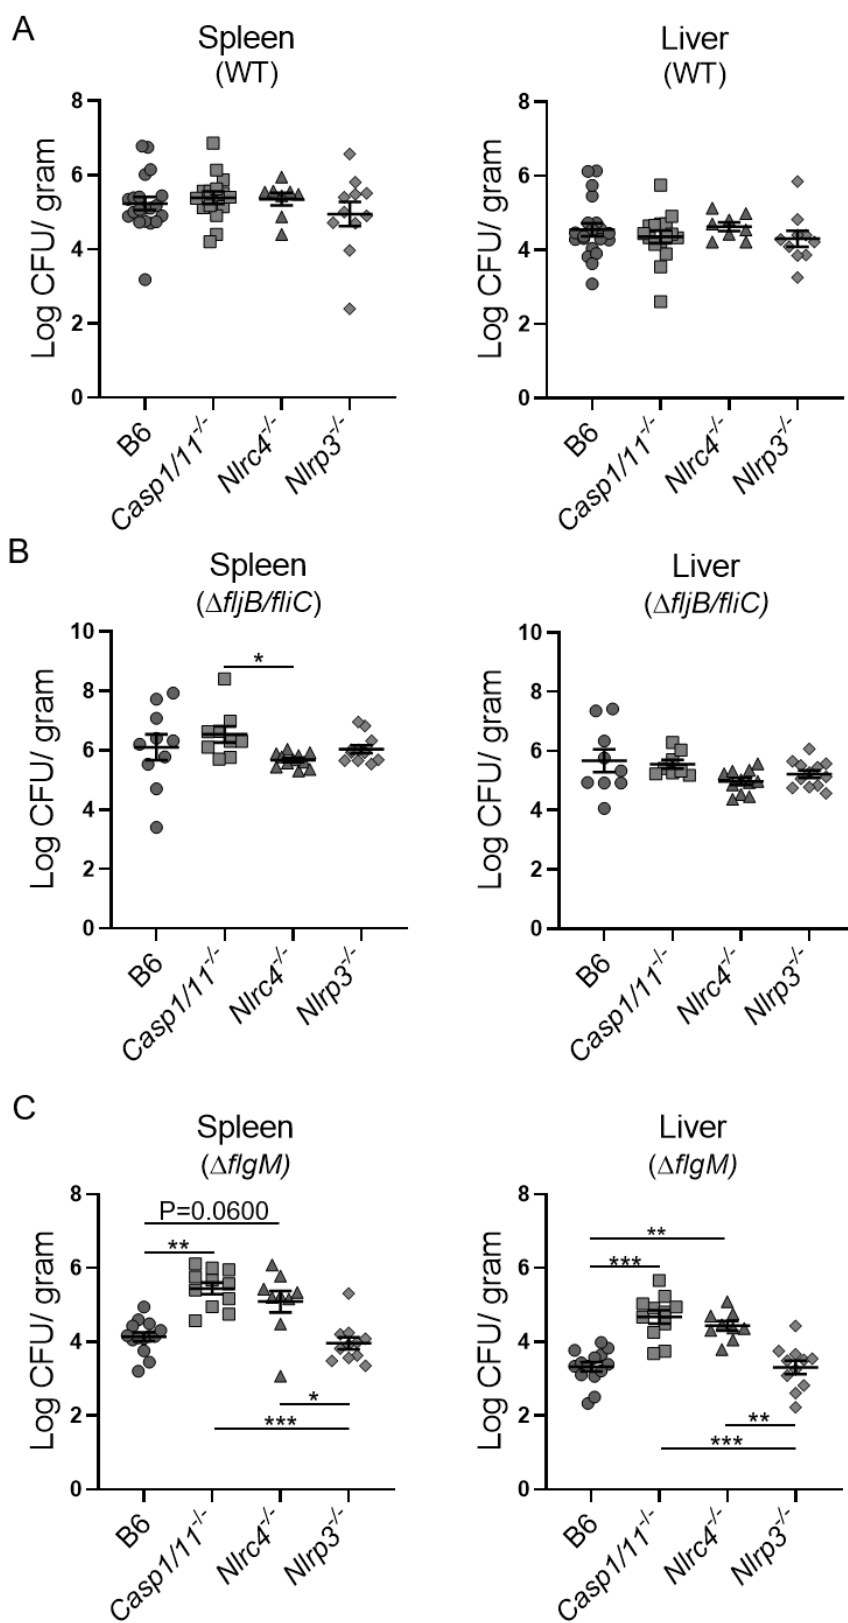

708  
709



710 **FIGURE 2**

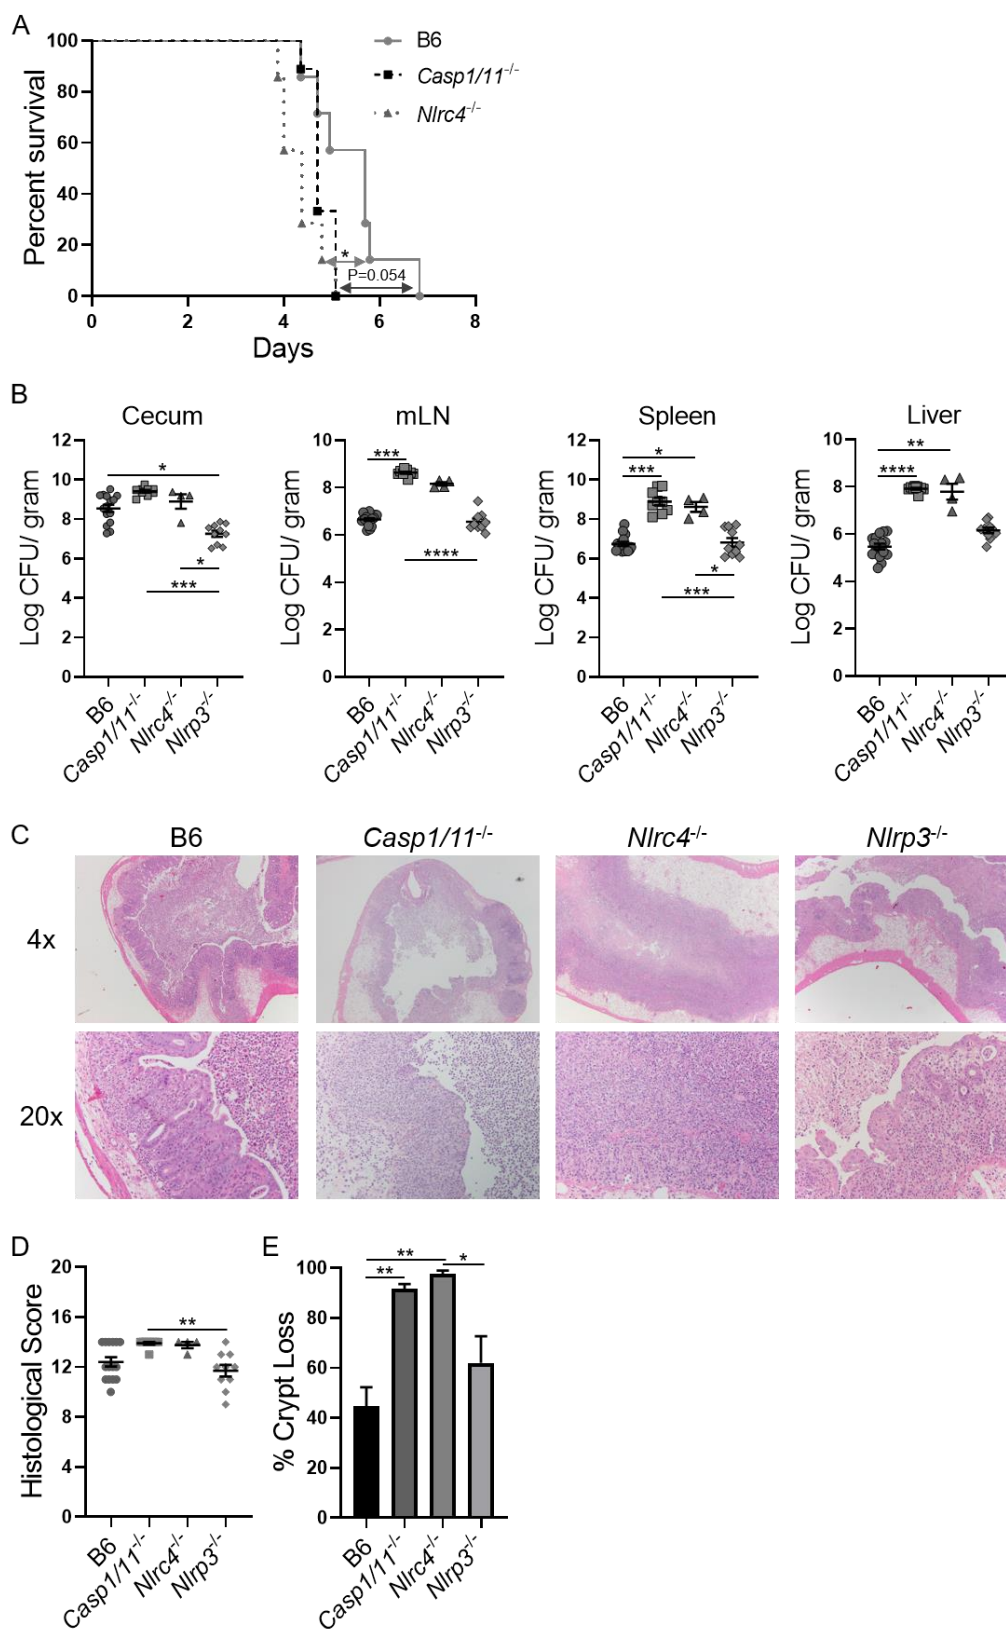

711  
712

713 **FIGURE 3**

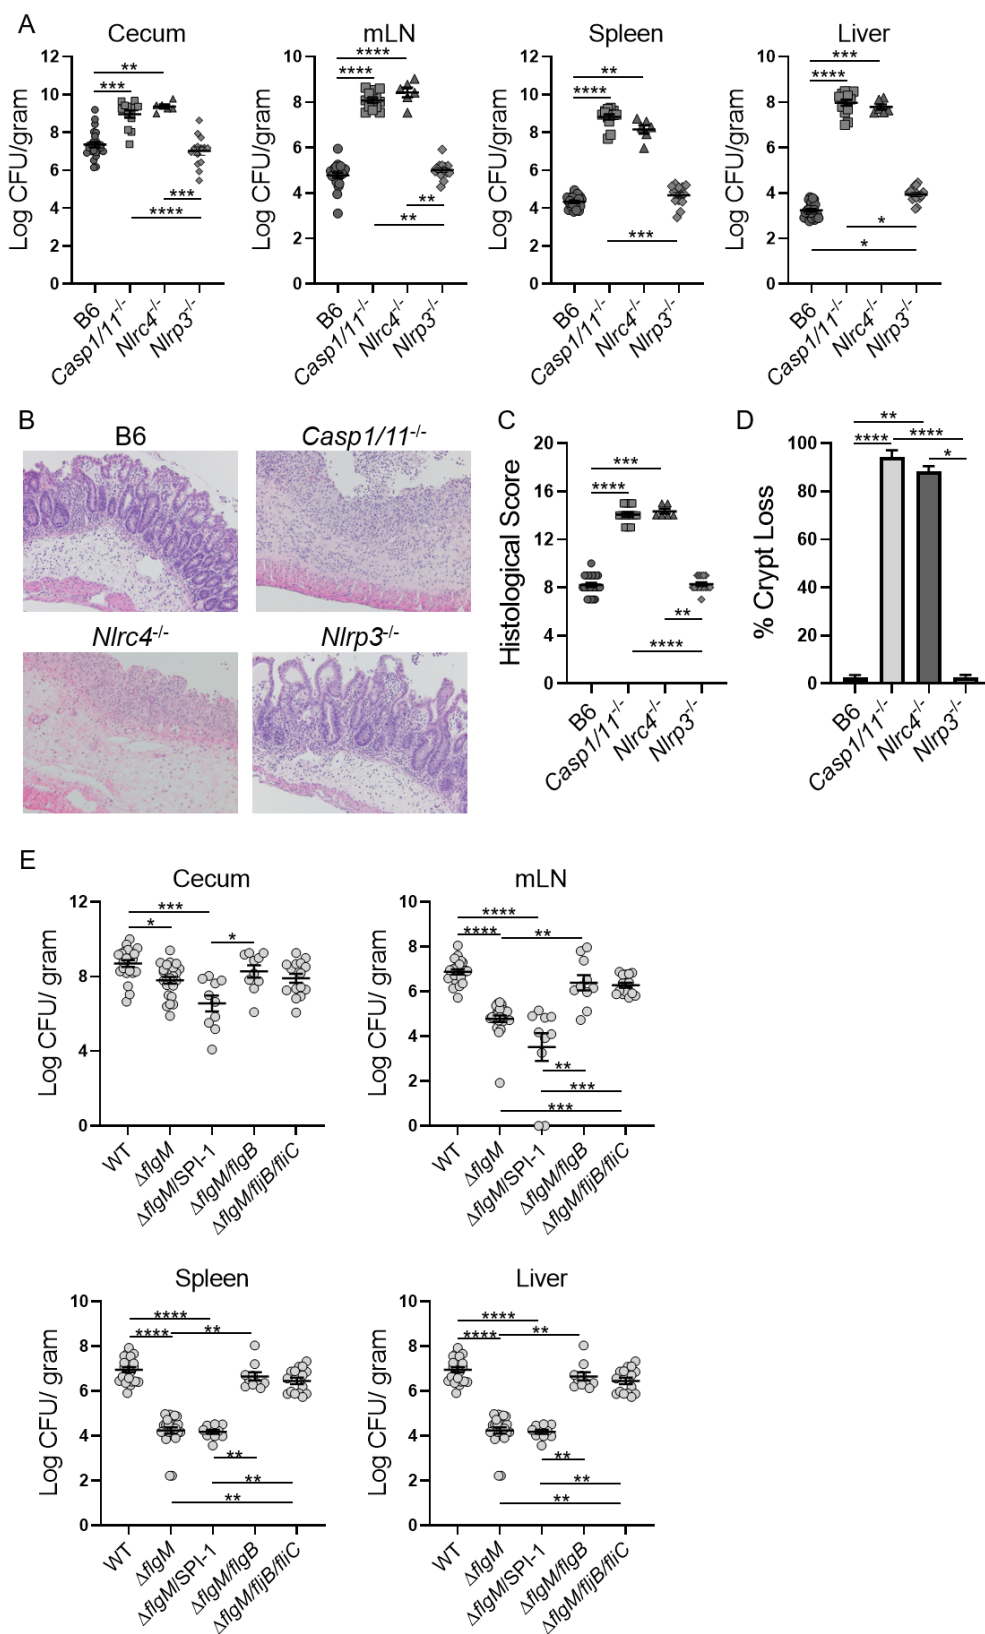

714  
715

716 **FIGURE 4**

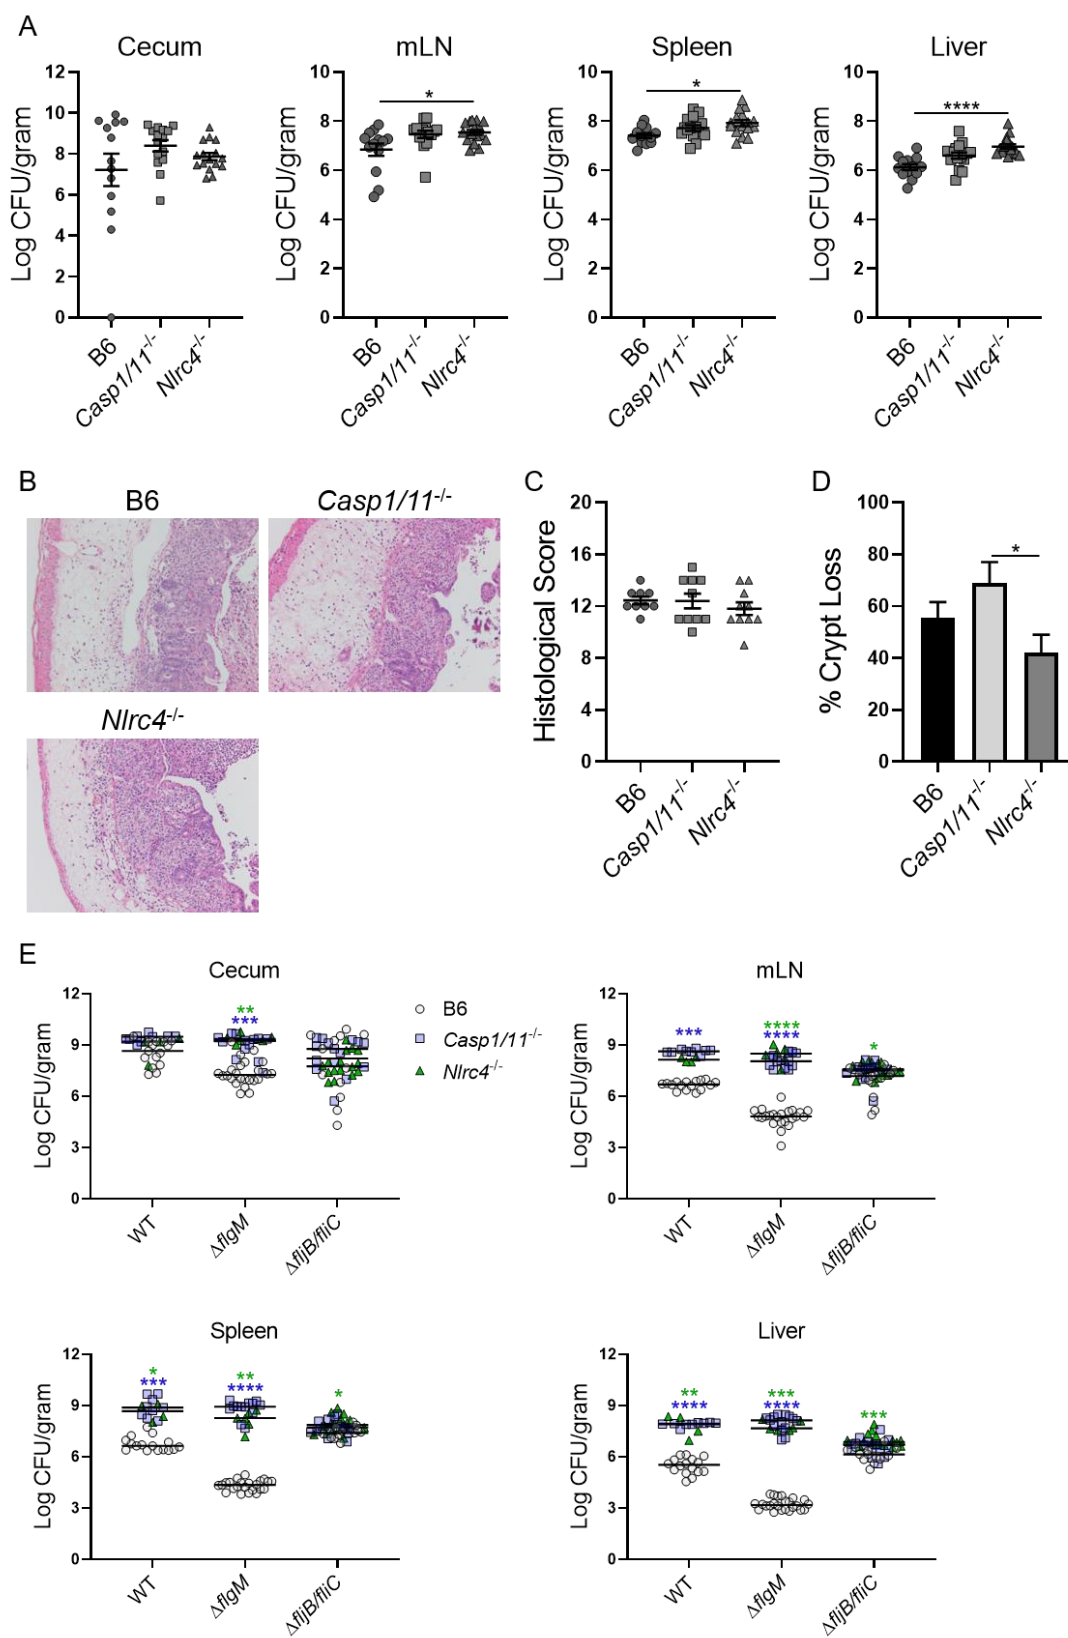

717  
718

719 **FIGURE 5**

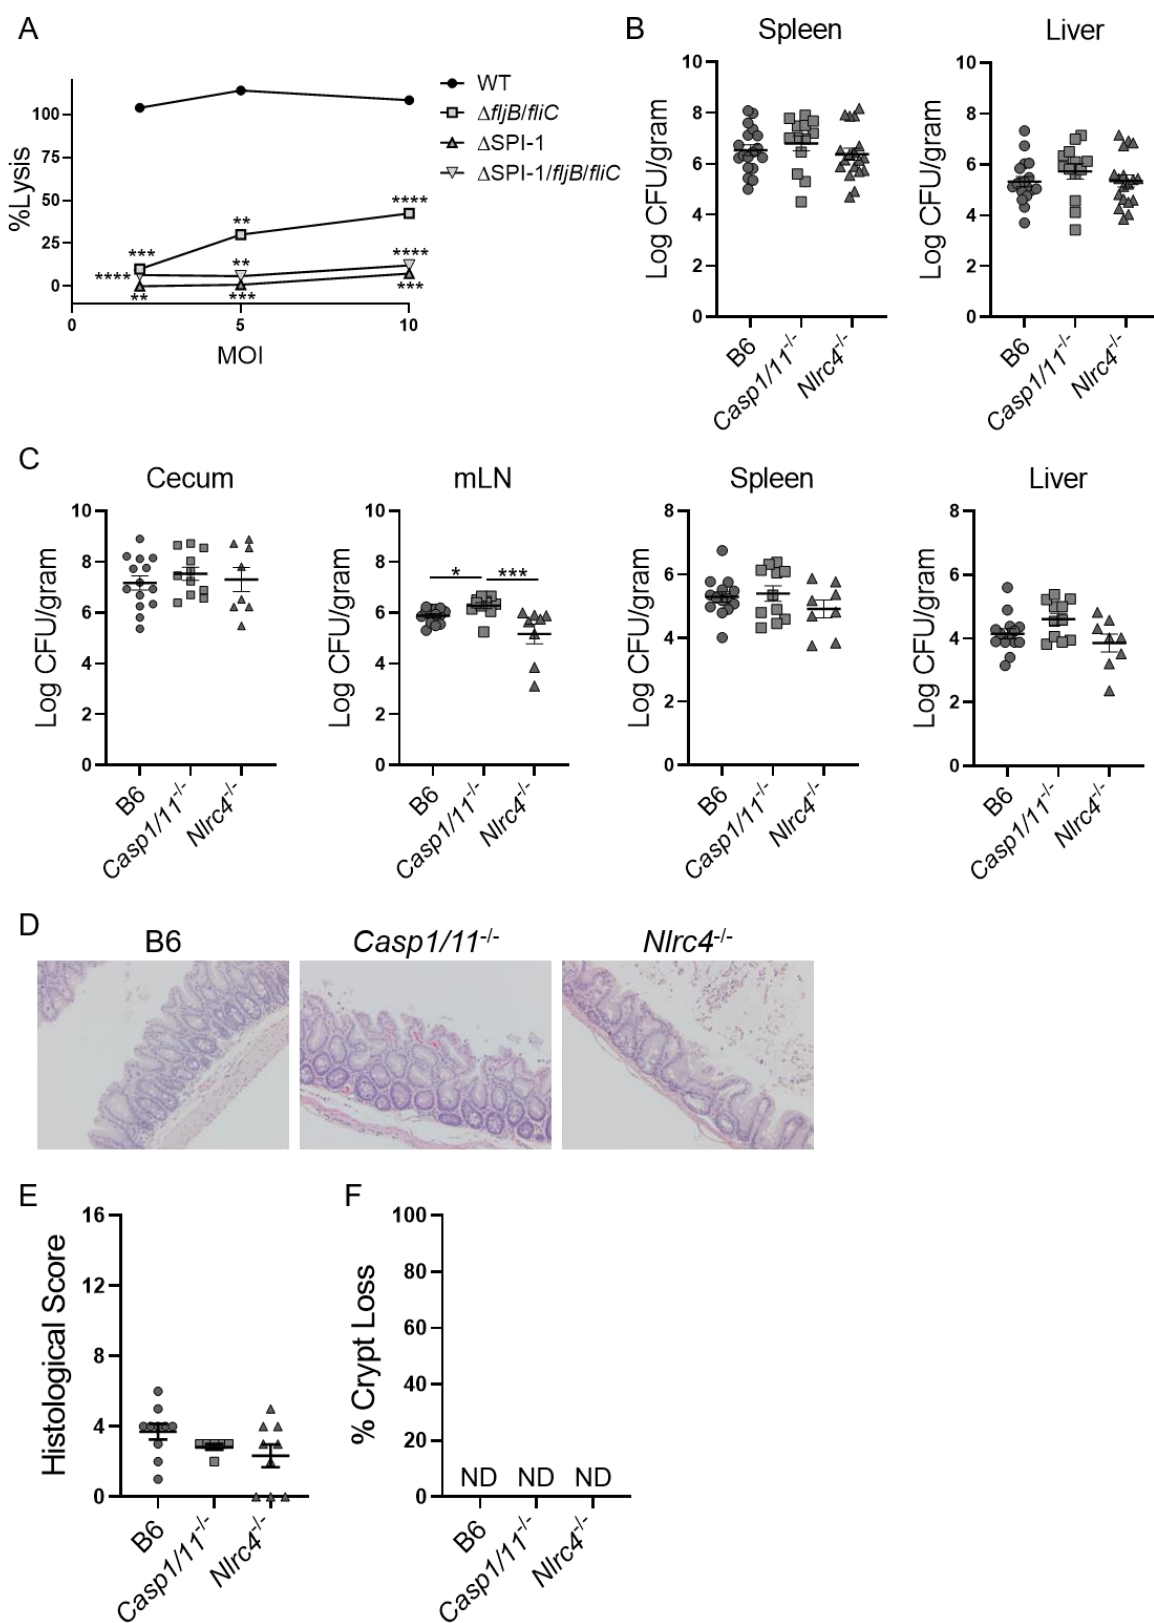

720  
721

722 SUP. FIGURE 1

A

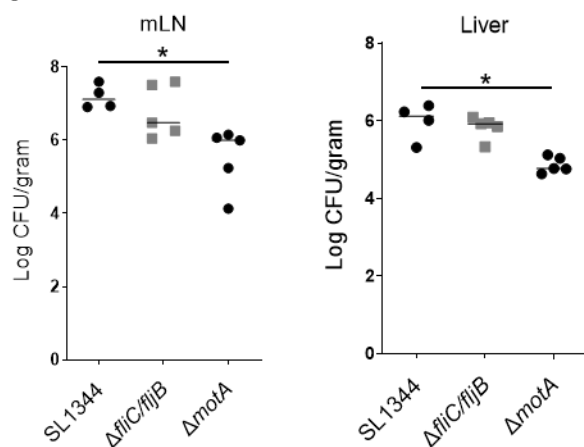

723  
724  
725  
726  
727  
728  
729  
730  
731  
732  
733  
734  
735  
736  
737  
738  
739  
740  
741  
742  
743  
744  
745  
746  
747  
748  
749  
750  
751  
752  
753  
754  
755  
756  
757

758 SUP. FIGURE 2

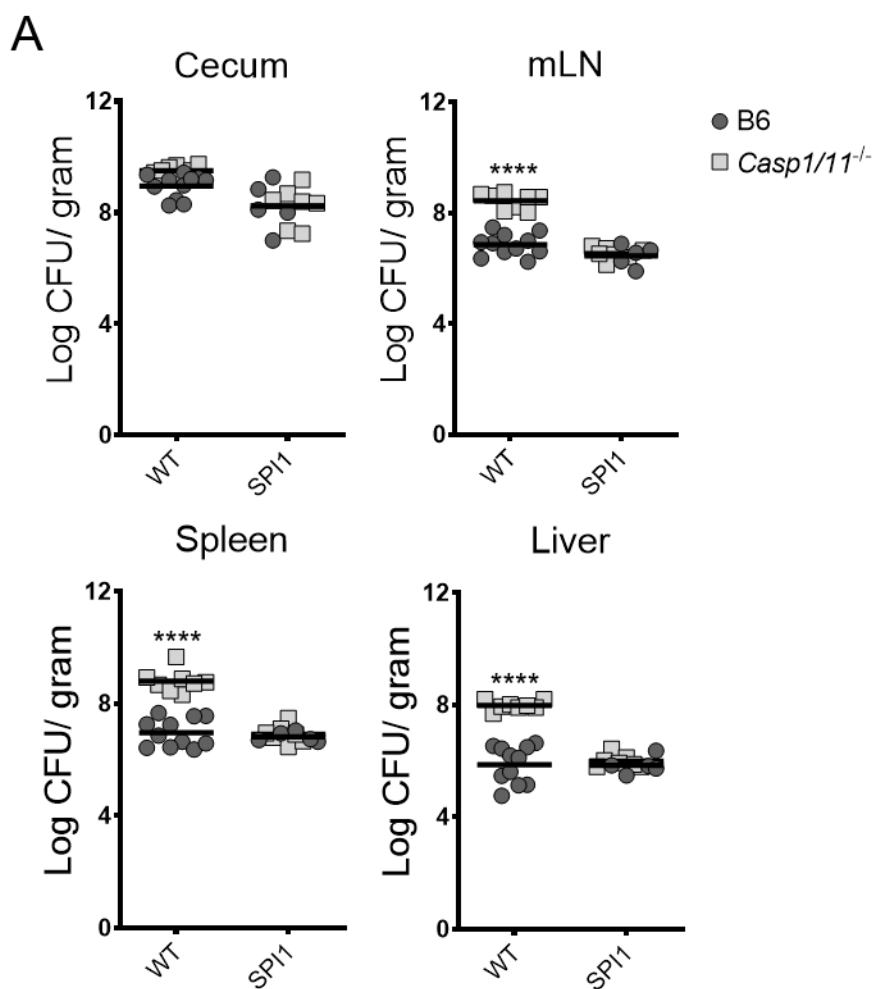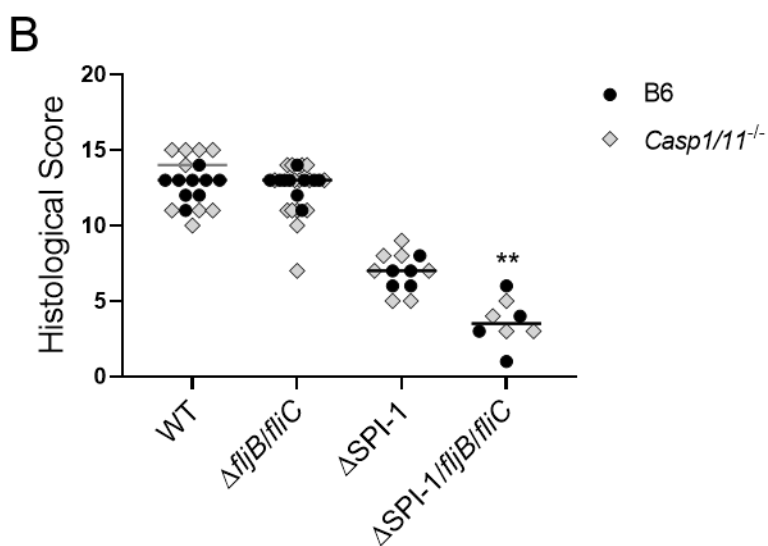

759
